# Supplementary material
Source: PubMed Central journal article supplement (PMC5310126)
Supplement: mmc1.pdf [file mmc1.pdf]

## **e-Appendix 1.**

### **NIH Grant Support and Disclaimer**

The project described was supported by Award Number R01HL089897 and Award Number R01HL089856 from the National Heart, Lung, And Blood Institute. The content is solely the responsibility of the authors and does not necessarily represent the official views of the National Heart, Lung, And Blood Institute or the National Institutes of Health.

### **COPD Foundation Funding**

The COPDGene® project is also supported by the COPD Foundation through contributions made to an Industry Advisory Board comprised of AstraZeneca, Boehringer Ingelheim, Novartis, Pfizer, Siemens, Sunovion, and GlaxoSmithKline

### **COPDGene® Investigators – Core Units**

*Administrative Core:* James Crapo, MD (PI), Edwin Silverman, MD, PhD (PI), Barry Make, MD, Elizabeth Regan, MD, PhD

*Genetic Analysis Core:* Terri Beaty, PhD, Nan Laird, PhD, Christoph Lange, PhD, Michael Cho, MD, Stephanie Santorico, PhD, John Hokanson, MPH, PhD, Dawn DeMeo, MD, MPH, Nadia Hansel, MD, MPH, Craig Hersh, MD, MPH, Peter Castaldi, MD, MSc, Merry-Lynn McDonald, PhD, Emily Wan, MD, Megan Hardin, MD, Jacqueline Hetmanski, MS, Margaret Parker, MS, Marilyn Foreman, MD, Brian Hobbs, MD, Robert Busch, MD, Adel El-Boueiz, MD, Peter Castaldi, MD, Megan Hardin, MD, Dandi Qiao, PhD, Elizabeth Regan, MD, Eitan Halper-Stromberg, Ferdouse Begum, Sungho Won, Sharon Lutz, PhD

*Imaging Core:* David A Lynch, MB, Harvey O Coxson, PhD, MeiLan K Han, MD, MS, MD, Eric A Hoffman, PhD, Stephen Humphries MS, Francine L Jacobson, MD, Philip F Judy, PhD, Ella A Kazerooni, MD, John D Newell, Jr., MD, Elizabeth Regan, MD, James C Ross, PhD, Raul San Jose Estepar, PhD, Berend C Stoel, PhD, Juerg Tschirren, PhD, Eva van Rikxoort, PhD, Bram van Ginneken, PhD, George Washko, MD, Carla G Wilson, MS, Mustafa Al Qaisi, MD, Teresa Gray, Alex Kluiber, Tanya Mann, Jered Sieren, Douglas Stinson, Joyce Schroeder, MD, Edwin Van Beek, MD, PhD

*PFT QA Core, Salt Lake City, UT:* Robert Jensen, PhD

*Data Coordinating Center and Biostatistics, National Jewish Health, Denver, CO:* Douglas Everett, PhD, Anna Faino, MS, Matt Strand, PhD, Carla Wilson, MS

*Epidemiology Core, University of Colorado Anschutz Medical Campus, Aurora, CO:* John E. Hokanson, MPH, PhD, Gregory Kinney, MPH, PhD, Sharon Lutz, PhD, Kendra Young PhD, Katherine Pratte, MSPH, Lindsey Duca, MS

**COPDGene® Investigators – Clinical Centers**

*Ann Arbor VA:* Jeffrey L. Curtis, MD, Carlos H. Martinez, MD, MPH, Perry G. Pernicano, MD

*Baylor College of Medicine, Houston, TX:* Nicola Hanania, MD, MS, Philip Alapat, MD, Venkata Bandi, MD, Mustafa Atik, MD, Aladin Boriek, PhD, Kalpatha Guntupalli, MD, Elizabeth Guy, MD, Amit Parulekar, MD, Arun Nachiappan, MD

*Brigham and Women's Hospital, Boston, MA:* Dawn DeMeo, MD, MPH, Craig Hersh, MD, MPH, George Washko, MD, Francine Jacobson, MD, MPH

*Columbia University, New York, NY:* R. Graham Barr, MD, DrPH, Byron Thomashow, MD, John Austin, MD, Belinda D'Souza, MD, Gregory D.N. Pearson, MD, Anna Rozenshtein, MD, MPH, FACR

*Duke University Medical Center, Durham, NC:* Neil MacIntyre, Jr., MD, Lacey Washington, MD, H. Page McAdams, MD

*Health Partners Research Foundation, Minneapolis, MN:* Charlene McEvoy, MD, MPH, Joseph Tashjian, MD

*Johns Hopkins University, Baltimore, MD:* Robert Wise, MD, Nadia Hansel, MD, MPH, Robert Brown, MD, Karen Horton, MD, Nirupama Putcha, MD, MHS,

*Los Angeles Biomedical Research Institute at Harbor UCLA Medical Center, Torrance, CA:* Richard Casaburi, PhD, MD, Alessandra Adami, PhD, Janos Porszasz, MD, PhD, Hans Fischer, MD, PhD, Matthew Budoff, MD, Harry Rossiter, PhD

*Michael E. DeBakey VAMC, Houston, TX:* Amir Sharafkhaneh, MD, PhD, Charlie Lan, DO

*Minneapolis VA:* Christine Wendt, MD, Brian Bell, MD

*Morehouse School of Medicine, Atlanta, GA:* Marilyn Foreman, MD, MS, Gloria Westney, MD, MS, Eugene Berkowitz, MD, PhD

*National Jewish Health, Denver, CO:* Russell Bowler, MD, PhD, David Lynch, MD

*Reliant Medical Group, Worcester, MA:* Richard Rosiello, MD, David Pace, MD

*Temple University, Philadelphia, PA:* Gerard Criner, MD, David Ciccolella, MD, Francis Cordova, MD, Chandra Dass, MD, Gilbert D'Alonzo, DO, Parag Desai, MD, Michael Jacobs, PharmD, Steven Kelsen, MD, PhD, Victor Kim, MD, A. James Mamary, MD, Nathaniel Marchetti, DO, Aditi Satti, MD, Kartik Shenoy, MD, Robert M. Steiner, MD, Alex Swift, MD, Irene Swift, MD, Maria Elena Vega-Sanchez, MD

*University of Alabama, Birmingham, AL:* Mark Dransfield, MD, William Bailey, MD, J. Michael Wells, MD, Surya Bhatt, MD, Hrudaya Nath, MD

*University of California, San Diego, CA:* Joe Ramsdell, MD, Paul Friedman, MD, Xavier Soler, MD, PhD, Andrew Yen, MD

*University of Iowa, Iowa City, IA:* Alejandro Cornellas, MD, John Newell, Jr., MD, Brad Thompson, MD

*University of Michigan, Ann Arbor, MI:* MeiLan Han, MD, Ella Kazerooni, MD, Carlos Martinez, MD

*Online supplements are not copyedited prior to posting and the author(s) take full responsibility for the accuracy all data.*

University of Minnesota, Minneapolis, MN: Joanne Billings, MD, Tadashi Allen, MD

University of Pittsburgh, Pittsburgh, PA: Frank Sciruba, MD, Divay Chandra, MD, MSc, Joel Weissfeld, MD, MPH, Carl Fuhrman, MD, Jessica Bon, MD

University of Texas Health Science Center at San Antonio, San Antonio, TX: Antonio Anzueto, MD, Sandra Adams, MD, Diego Maselli-Caceres, MD, Mario E. Ruiz, MD

**e-Table 1. Univariable Associations with Health Outcomes**

| Outcome          | $\beta$ (95% CI)           | p-value |
|------------------|----------------------------|---------|
| Obesity exposure |                            |         |
| SGRQ Total Score |                            |         |
| Obese class I    | 2.42 (0.63, 4.21)          | 0.008   |
| Obese Class II   | 5.52 (2.97, 8.08)          | <0.001  |
| Obese Class III  | 9.54 (6.27, 12.80)         | <0.001  |
| SF-36 T score    |                            |         |
| Obese class I    | -1.00 (-2.34, 0.35)        | 0.147   |
| Obese class II   | -2.66 (-4.61, -0.71)       | 0.008   |
| Obese class III  | -4.07 (-6.49, -1.66)       | 0.001   |
| 6MWD             |                            |         |
| Obese class I    | -52.24 (-84.70, -19.78)    | 0.002   |
| Obese class II   | -125.64 (-172.05, -79.23)  | <0.001  |
| Obese class III  | -305.06 (-364.74, -245.38) | <0.001  |
|                  | OR (95% CI)                | p-value |
| mMRC $\geq$ 2    |                            |         |
| Obese class I    | 1.19 (1.00, 1.41)          | 0.053   |
| Obese class II   | 1.80 (1.37, 2.35)          | <0.001  |
| Obese class III  | 3.42 (2.26, 5.19)          | <0.001  |
| Moderate AECOPD  |                            |         |
| Obese class I    | 1.27 (1.00, 1.60)          | 0.047   |
| Obese class II   | 1.20 (0.86, 1.68)          | 0.284   |
| Obese class III  | 1.06 (0.68, 1.65)          | 0.806   |
| Severe AECOPD    |                            |         |
| Obese class I    | 1.04 (0.85, 1.27)          | 0.685   |
| Obese class II   | 1.17 (0.88, 1.54)          | 0.276   |
| Obese class III  | 1.57 (1.13, 2.18)          | 0.007   |

Abbreviations:  $\beta$ , beta coefficient; 6MWD, 6-Minute Walk Distance; AECOPD, Acute Exacerbation of COPD; CI, confidence interval; mMRC, modified Medical Research Council; OR, odds ratio; SF-36, Short Form 35; SGRQ, Saint George's Respiratory Questionnaire

**e-Table 2. Health Outcome Multivariable Models with Individual Comorbidities**

| Exposure of Interest        | SGRQ Total Score    |         | SF-36 T score        |         | 6MWD                       |         |
|-----------------------------|---------------------|---------|----------------------|---------|----------------------------|---------|
|                             | $\beta$ (95% CI)    | p-value | $\beta$ (95% CI)     | p-value | $\beta$ (95% CI)           | p-value |
| Obesity                     |                     |         |                      |         |                            |         |
| Obese class I               | 2.04 (0.54, 3.54)   | 0.008   | -0.76 (-1.96, 0.43)  | 0.212   | -54.57 (-82.57, -26.56)    | <0.001  |
| Obese Class II              | 3.03 (0.84, 5.22)   | 0.007   | -0.86 (-2.66, 0.94)  | 0.349   | -123.17 (-164.08, -82.27)  | <0.001  |
| Obese Class III             | 5.40 (2.57, 8.22)   | <0.001  | -0.93 (-3.16, 1.31)  | 0.417   | -286.55 (-339.77, -233.34) | <0.001  |
| Allergies                   | 0.74 (-0.65, 2.13)  | 0.297   | -0.94 (-2.07, 0.18)  | 0.101   | 5.36 (-20.66, 31.39)       | 0.686   |
| Asthma                      | 6.60 (5.16, 8.04)   | <0.001  | -3.27 (-4.43, -2.12) | <0.001  | 15.31 (-11.60, 42.22)      | 0.265   |
| Cancer                      | 1.79 (-0.56, 4.15)  | 0.135   | -1.71 (-3.64, 0.23)  | 0.084   | -11.41 (-55.68, 32.85)     | 0.613   |
| Coronary Heart Disease      | 1.88 (0.18, 3.58)   | 0.030   | -1.86 (-3.21, -0.52) | 0.007   | -64.99 (-96.83, -33.14)    | <0.001  |
| Congestive Heart Failure    | 1.44 (-1.23, 4.11)  | 0.291   | -0.11 (-2.20, 1.97)  | 0.914   | -89.18 (-140.19, -38.16)   | 0.001   |
| CVA / TIA                   | 4.79 (2.29, 7.28)   | <0.001  | -2.01 (-3.94, -0.09) | 0.040   | -28.87 (-75.47, 17.73)     | 0.225   |
| Diabetes mellitus           | 1.18 (-0.62, 2.99)  | 0.198   | -1.64 (-3.06, -0.21) | 0.024   | -37.68 (-71.57, -3.79)     | 0.029   |
| GERD                        | 3.61 (2.27, 4.96)   | <0.001  | -1.71 (-2.78, -0.63) | 0.002   | -23.44 (-48.67, 1.79)      | 0.069   |
| Hypertension                | 0.82 (-0.44, 2.09)  | 0.201   | 0.52 (-0.51, 1.56)   | 0.319   | -17.00 (-40.60, 6.61)      | 0.158   |
| Hyperlipidemia              | -0.15 (-1.44, 1.14) | 0.820   | -0.56 (-1.60, 0.47)  | 0.285   | 32.58 (8.39, 56.77)        | 0.008   |
| Obstructive Sleep Apnea     | 5.84 (4.21, 7.47)   | <0.001  | -2.94 (-4.28, -1.61) | <0.001  | -46.39 (-77.00, -15.78)    | 0.003   |
| Osteoarthritis              | 1.45 (-0.06, 2.96)  | 0.060   | -0.03 (-1.23, 1.17)  | 0.965   | -29.00 (-57.22, -0.77)     | 0.044   |
| Osteoporosis                | 2.86 (1.24, 4.48)   | 0.001   | -2.66 (-3.99, -1.32) | <0.001  | -44.34 (-74.82, -13.87)    | 0.004   |
| Peptic ulcer disease        | 1.38 (-0.59, 3.34)  | 0.171   | -1.61 (-3.19, -0.04) | 0.045   | 0.52 (-36.53, 37.57)       | 0.978   |
| Peripheral arterial disease | 0.14 (-3.13, 3.40)  | 0.935   | -1.04 (-3.63, 1.56)  | 0.435   | -82.78 (-143.52, -22.02)   | 0.008   |
| Rheumatoid arthritis        | 5.28 (3.19, 7.36)   | <0.001  | -1.45 (-3.13, 0.23)  | 0.090   | -40.20 (-79.17, -1.24)     | 0.043   |
| Exposure of Interest        | mMRC                |         | Moderate AECOPD      |         | Severe AECOPD              |         |
|                             | OR (95% CI)         | p-value | OR (95% CI)          | p-value | OR (95% CI)                | p-value |

|                             |      |              |        |      |              |        |      |              |        |
|-----------------------------|------|--------------|--------|------|--------------|--------|------|--------------|--------|
| Obesity                     |      |              |        |      |              |        |      |              |        |
| Obese class I               | 1.22 | (0.99, 1.50) | 0.058  | 1.22 | (0.95, 1.57) | 0.124  | 1.04 | (0.84, 1.29) | 0.725  |
| Obese class II              | 1.67 | (1.21, 2.30) | 0.002  | 1.06 | (0.73, 1.52) | 0.771  | 1.10 | (0.81, 1.50) | 0.550  |
| Obese class III             | 2.92 | (1.82, 4.69) | <0.001 | 0.79 | (0.48, 1.28) | 0.337  | 1.42 | (0.97, 2.08) | 0.069  |
| Allergies                   | 0.91 | (0.75, 1.11) | 0.349  | 1.28 | (1.2, 1.60)  | 0.034  | 1.10 | (0.91, 1.34) | 0.317  |
| Asthma                      | 1.55 | (1.25, 1.92) | <0.001 | 1.56 | (1.24, 1.95) | <0.001 | 1.72 | (1.42, 2.08) | <0.001 |
| Cancer                      | 0.95 | (0.69, 1.31) | 0.758  | 0.93 | (0.61, 1.41) | 0.723  | 1.25 | (0.89, 1.76) | 0.193  |
| Coronary Heart Disease      | 1.42 | (1.11, 1.82) | 0.005  | 1.09 | (0.82, 1.46) | 0.537  | 1.03 | (0.81, 1.32) | 0.798  |
| Congestive Heart Failure    | 1.66 | (1.04, 2.66) | 0.035  | 0.92 | (0.60, 1.40) | 0.699  | 1.45 | (1.02, 2.04) | 0.036  |
| CVA / TIA                   | 1.40 | (0.98, 2.02) | 0.067  | 1.57 | (1.06, 2.32) | 0.025  | 1.52 | (1.08, 2.14) | 0.017  |
| Diabetes mellitus           | 1.07 | (0.82, 1.40) | 0.609  | 1.42 | (1.07, 1.89) | 0.016  | 1.15 | (0.89, 1.48) | 0.276  |
| GERD                        | 1.39 | (1.15, 1.69) | 0.001  | 1.17 | (0.93, 1.46) | 0.179  | 1.17 | (0.97, 1.42) | 0.103  |
| Hypertension                | 1.12 | (0.94, 1.34) | 0.199  | 1.01 | (0.81, 1.26) | 0.907  | 0.93 | (0.77, 1.11) | 0.410  |
| Hyperlipidemia              | 1.08 | (0.90, 1.29) | 0.430  | 0.92 | (0.74, 1.14) | 0.447  | 1.03 | (0.85, 1.24) | 0.750  |
| Obstructive Sleep Apnea     | 1.56 | (1.22, 1.98) | <0.001 | 1.47 | (1.14, 1.91) | 0.003  | 1.11 | (0.88, 1.40) | 0.370  |
| Osteoarthritis              | 1.17 | (0.94, 1.45) | 0.164  | 0.98 | (0.76, 1.26) | 0.861  | 0.82 | (0.66, 1.03) | 0.090  |
| Osteoporosis                | 1.40 | (1.10, 1.77) | 0.006  | 1.45 | (1.12, 1.87) | 0.005  | 1.25 | (0.99, 1.57) | 0.056  |
| Peptic ulcer disease        | 1.23 | (0.92, 1.64) | 0.164  | 1.12 | (0.82, 1.54) | 0.471  | 1.06 | (0.80, 1.39) | 0.690  |
| Peripheral arterial disease | 1.10 | (0.68, 1.80) | 0.699  | 0.94 | (0.54, 1.20) | 0.829  | 0.90 | (0.55, 1.45) | 0.652  |
| Rheumatoid arthritis        | 1.40 | (1.03, 1.90) | 0.033  | 0.83 | (0.57, 1.20) | 0.315  | 1.34 | (1.01, 1.77) | 0.042  |

Adjusted for: age, gender, race, education, FEV<sub>1</sub>/Ht<sup>2</sup>, smoking status, and smoking pack-years.

Referent for obesity class: Normal/overweight individuals (BMI 18.5 – 29.9kg/m<sup>2</sup>)

Abbreviations: β, beta coefficient; 6MWD, 6-Minute Walk Distance; AECOPD, Acute Exacerbation of COPD; CI, confidence interval; CVA, cerebrovascular attack; GERD, gastroesophageal reflux disease; mMRC, modified Medical Research Council; OR, odds ratio; SF-36, Short Form 35; SGRQ, Saint George's Respiratory Questionnaire; TIA, transient ischemic attack
